# Supplementary material for: Humoral Dysregulation Associated with Increased Systemic Inflammation among Injection Heroin Users
Source: PLoS One. 2016 Jul 5;11(7):e0158641. doi: 10.1371/journal.pone.0158641 (PMC4933366; doi:10.1371/journal.pone.0158641)
Supplement: S1 File — List of features used in SVM analysis. (XLSX) [file pone.0158641.s001.xlsx]

## Sheet: Machine learning Classifier
Atributes used in machine learning training (216)
CD19+CD20low/CD24++CD38++,Freq. of,CD19+CD20low
gp140_IgM
CD19+,Freq. of,lymph
CD19+CD20+,Freq. of,lymph
PlasmaLPS
Plasma Ceramide 946.3 / 264.4
Total_IgA
Plasma Ceramide 700.0 / 264.4
CD4+CD3+/CD95-CD183+,Freq. of,CD4+CD3+
HepC_IgG
Total_IgM
Flow_Batch
CD19+CD20+/IgD-/CD95+,Freq. of,IgD-
IL8
Plasma Ceramide 756.1 / 264.4
Plasma Ceramide 784.2 / 264.4
Plasma Ceramide 786.2 / 266.4
IgG1
CD19+20low/CD27+/CD27+IgM+,Freq. of,CD19+CD20low
CD4+CD3+/CD95-CD183-,Freq. of,CD4+CD3+
CD19+CD20low/IgD-CD27-,Freq. of,CD19+CD20low
MDC
CD19+CD20+/IgG+,Freq. of,CD19+CD20+
CD19+CD20low/IgD-CD95+,Freq. of,CD19+CD20low
CD19+/IgG+,Freq. of,CD19+
Plasma Ceramide 862.2 / 264.4
CD19+CD20low/CD21-CD27+,Freq. of,CD19+CD20low
MCP1
CD19+CD20low/IgD-/CD95+,Freq. of,IgD-
CD19+CD20low/IgD-/CD27+,Freq. of,IgD-
Plasma Ceramide 864.2 / 266.4
CD19+/IgD-/CD95+,Freq. of,IgD-
CD19+20low/CD21-CD27-,Freq. of,CD19+CD20low
sCD40L
IgG3
CD14+,Freq. of,lymph
CD19+CD20low/IgD-/CD95+,Freq. of,CD19+CD20low
CD19+/IgD-/CD27+,Freq. of,IgD-
CD19+CD20low/IgD-/CD27+,Freq. of,CD19+CD20low
CD19+/IgD+CD183+,Freq. of,CD19+
CD19+CD20low/CD27+,Freq. of,CD19+CD20low
CD19+CD20+/IgD-/IgD-CD27++,Freq. of,CD19+CD20+
CD19+CD20low/IgG+,Freq. of,CD19+CD20low
Plasma Ceramide 624.5 / 266.4
CD19+CD20low/IgD-CD27+,Freq. of,CD19+CD20low
CD19+CD20low/IgD-/IgD-CD27++,Freq. of,CD19+CD20low
Plasma Ceramide 972.4 / 264.4
CD19+/IgD-CD27-,Freq. of,CD19+
CD19+CD20low/IgD-/IgD-CD27++,Freq. of,IgD-
CD19+CD20+/IgD+CD183+,Freq. of,CD19+CD20+
CD19+CD20low/CD27+/IgM+CD27+CD95+,Freq. of,CD19+CD20low
CD14+/CD183+,Freq. of,CD14+
CD19+CD20+/IgD-/IgD-CD27++,Freq. of,IgD-
Plasma Ceramide 728.1 / 264.4
CD19+CD20low/IgD+CD183+,Freq. of,CD19+CD20low
Plasma Ceramide 566.3 / 264.4
CD19+/IgD-/CD19+CD20low,Freq. of,IgD-
CD4+CD3+/CD95+CD183+,Freq. of,CD4+CD3+
dsDNA_IgG
CD19+/IgD-/IgD-CD27++,Freq. of,CD19+
Sm_IgG
CD19+CD20+/CD21-CD27+,Freq. of,CD19+CD20+
gp140_IgG
CD19+/IgD-/IgD-CD27++,Freq. of,IgD-
IgG2
CD19+/CD21-CD27-,Freq. of,CD19+
CD19+CD20low/IgD+CD27-,Freq. of,CD19+CD20low
CD19+CD20low/IgD-CD183+,Freq. of,CD19+CD20low
CD19+CD20low,Freq. of,lymph
CD19+CD20+/IgD-/IgD-CD95+CD183+,Freq. of,IgD-
Plasma Ceramide 810.3 / 264.4
CD19+CD20+/IgD-CD95+,Freq. of,CD19+CD20+
CD19+CD20+/IgD-/CD27+,Freq. of,IgD-
IgG4
Plasma Ceramide 679.0 / 264.4
CD19+CD20+/IgD-/CD95+,Freq. of,CD19+CD20+
CD19+CD20low/IgD-CD138+,Freq. of,CD19+CD20low
Plasma Ceramide 1000.4 / 264.4
CD19+/CD21-CD27+,Freq. of,CD19+
CD19+/CD19+CD20low/IgD-/IgD-CD95+CD183+,Freq. of,CD19+
CD19+/IgD-/CD19+CD20low/IgD-CD95+CD183+,Freq. of,CD19+
Plasma Ceramide 620.5 / 264.4
IL10
CD19+CD20+/IgD+CD183-,Freq. of,CD19+CD20+
Plasma Ceramide 812.3 / 264.4
Plasma Ceramide 974.4 / 264.4
Tet_IgG
CD19+CD20low/IgD+CD27+,Freq. of,CD19+CD20low
CD19+CD20low/IgD-,Freq. of,CD19+CD20low
CD19+/IgD-/CD19+CD20low/IgD-CD95+CD183+,Freq. of,IgD-
CD19+/IgD-/CD183+,Freq. of,IgD-
CD19+/CD19hi20hi,Freq. of,lymph
CD19+/IgD-CD95+,Freq. of,CD19+
CD19+/IgD-/CD95+,Freq. of,CD19+
CD19+/IgD-/CD183+,Freq. of,CD19+
CD19+/CD19+20low/IgD-,Freq. of,CD19+
CD19+/IgD-/19+20low,Freq. of,CD19+
CD14+/CD183+,lymph
CD19+/CD19+CD20low,Freq. of,CD19+
Plasma Ceramide 648.9 / 264.4
CD19+CD20low/IgD+CD183-,Freq. of,CD19+CD20low
CD19+/IgD-CD183+,Freq. of,CD19+
IL12_P40
IL1b
IL3
CD19+/IgD-/CD27+,Freq. of,CD19+
CD19+/IgD-/IgD-CD95+CD183+,Freq. of,IgD-
CD19+CD20+/IgD-CD138+,Freq. of,CD19+CD20+
MIP1b
MIP1a
IL7
CD19+CD20+/IgD-CD183+,Freq. of,CD19+CD20+
CD19+/IgD+CD183-,Freq. of,CD19+
TNFa
CD19+CD20low/IgD-/IgD-CD27++CD38+,Freq. of,IgD-
p24_IgG
CD19+CD20+/IgD-/CD183+,Freq. of,CD19+CD20+
IP10
Eotaxin
CD19+CD20low/IgD-/IgD-CD27++CD38+,Freq. of,CD19+CD20low
CD19+CD20+/IgD-CD27-,Freq. of,CD19+CD20+
CD19+CD20low/IgD-CD183-,Freq. of,CD19+CD20low
LPS IgG
CD19+CD20+/CD27+/IgM+CD27+CD95neg,Freq. of,CD19+CD20+
CD19+CD20+/IgD-/CD27+,Freq. of,CD19+CD20+
CD4+CD3+/CD95+CD183-,Freq. of,CD4+CD3+
CD19+CD20low/IgD+CD138+,Freq. of,CD19+CD20low
Plasma Ceramide 594.8 / 264.4
EGF
IL9
Plasma Ceramide 782.2 / 264.4
CD19+/CD27+,Freq. of,CD19+
CD19+/CD19hiCD20hi,Freq. of,CD19+
CD19+/IgD+CD27+,Freq. of,CD19+
IL15
Plasma Ceramide 538.9 / 264.4
CD19+CD20+/IgD-/IgD-CD27++CD38+,Freq. of,IgD-
CD19+/IgD+CD138+,Freq. of,CD19+
CD19+CD20low/CD27+/IgM+CD27+CD95neg,Freq. of,CD19+CD20low
CD19+/IgD-/CD19+CD20low/IgD-CD27++,Freq. of,IgD-
CD19+/IgD+CD27-,Freq. of,CD19+
FGF2
CD19+CD20+/IgD+CD138+,Freq. of,CD19+CD20+
CD19+/CD27+/IgM+CD27+CD95+,Freq. of,CD19+
CD19+CD20+/IgD-CD183-,Freq. of,CD19+CD20+
CD19+/IgD-/IgD-CD27++CD38+,Freq. of,IgD-
CD19+20low/CD21+CD27+,Freq. of,CD19+CD20low
CD19+CD20+/IgD-/CD183+,Freq. of,IgD-
CD19+CD20+/CD21+CD27+,Freq. of,CD19+CD20+
GRO
CD19+/IgD-/CD19+CD20low/IgD-CD27++,Freq. of,CD19+
CD19+/CD19+CD20low/IgD-/IgD-CD27++,Freq. of,CD19+
CD19+CD20+/IgD-,Freq. of,CD19+CD20+
IL6
CD19+/CD24++CD38++,Freq. of,CD19+
CD19+CD20+/CD21-CD27-,Freq. of,CD19+CD20+
sIL2RA
CD19+CD20low/CD21+CD27-,Freq. of,CD19+CD20low
CD19+/IgD-CD183-,Freq. of,CD19+
TGFa
CD19+/CD27+/IgM+CD27+CD95neg,Freq. of,CD19+
CD19+CD20low/IgD-/IgD-CD95+CD183+,Freq. of,CD19+CD20low
CD19+CD20+/CD24++CD38++,Freq. of,CD19+CD20+
IL1a
CD19+CD20low/IgD-/CD183+,Freq. of,CD19+CD20low
CD19+/IgD-/IgD-CD20lowCD27hi,Freq. of,CD19+
IL5
CD19+CD20low/IgD-/CD183+,Freq. of,IgD-
CD19+CD20low/IgD-/IgD-CD95+CD183+,Freq. of,IgD-
CD19+CD20+/CD27+/IgM+CD27+CD95+,Freq. of,CD19+CD20+
CD19+/IgD-/IgD-CD95+CD183+,Freq. of,CD19+
IFNa2
CD19+/IgD-/CD19+CD20low/IgD-CD27++CD38+,Freq. of,IgD-
IL13
IL17
CD19+/IgD-CD27+,Freq. of,CD19+
CD19+CD20+/IgD+CD27+,Freq. of,CD19+CD20+
Fractlkine
CD19+CD20+/CD27+,Freq. of,CD19+CD20+
MCP3
CD19+/CD21+CD27-,Freq. of,CD19+
CD19+/IgD-,Freq. of,CD19+
TNFb
VEGF
CD19+CD20+/IgD+CD27-,Freq. of,CD19+CD20+
IFNg
IL2
Plasma Ceramide 698.0 / 264.4
CD19+CD20+/IgD-/IgD-CD95+CD183+,Freq. of,CD19+CD20+
FLT3
IL4
cell_count
CD19+CD20+/IgD-/IgD-CD27++CD38+,Freq. of,CD19+CD20+
CD19+CD20+/CD27+/CD27+IgM+,Freq. of,CD19+CD20+
CD19+/IgD-CD138+,Freq. of,CD19+
Plasma Ceramide 814.3 / 266.4
IL12_P70
CD19+/IgD-/IgD-CD20lowCD27hi,Freq. of,IgD-
CD19+/IgD-/IgD-CD27++CD38+,Freq. of,CD19+
CD19+/CD19+CD20low/IgD-/IgD-CD27++CD138+,Freq. of,CD19+
Plasma Ceramide 652.9 / 266.4
CD19+/IgD-/CD19+CD20low/IgD-CD27++CD138+,Freq. of,CD19+
Plasma Ceramide 650.9 / 264.4
Plasma Ceramide 840.3 / 264.4
CD19+/IgD-/CD19+CD20low/IgD-CD27++CD138+,Freq. of,IgD-
GCSF
Total_IgG
GMCSF
CD19+/CD21+CD27+,Freq. of,CD19+
CD19+CD20+/CD21+CD27-,Freq. of,CD19+CD20+
CD4+CD3+,Freq. of,lymph
CD19+/CD27+/CD27+IgM+,Freq. of,CD19+
CD19+CD20+/IgD-CD27+,Freq. of,CD19+CD20+
Plasma Ceramide 622.5 / 264.4
CD19+/IgD-/CD19+CD20low/IgD-CD27++CD38+,Freq. of,CD19+
CD19+/CD19+CD20low/IgD-/IgD-CD27++CD38+,Freq. of,CD19+
